# Supplementary material for: Spatially resolved protein map of intact human cytomegalovirus virions
Source: PubMed Central journal article supplement (PMC10465357; doi:10.1038/s41564-023-01433-8), 2023-08-07

Fig. 4d

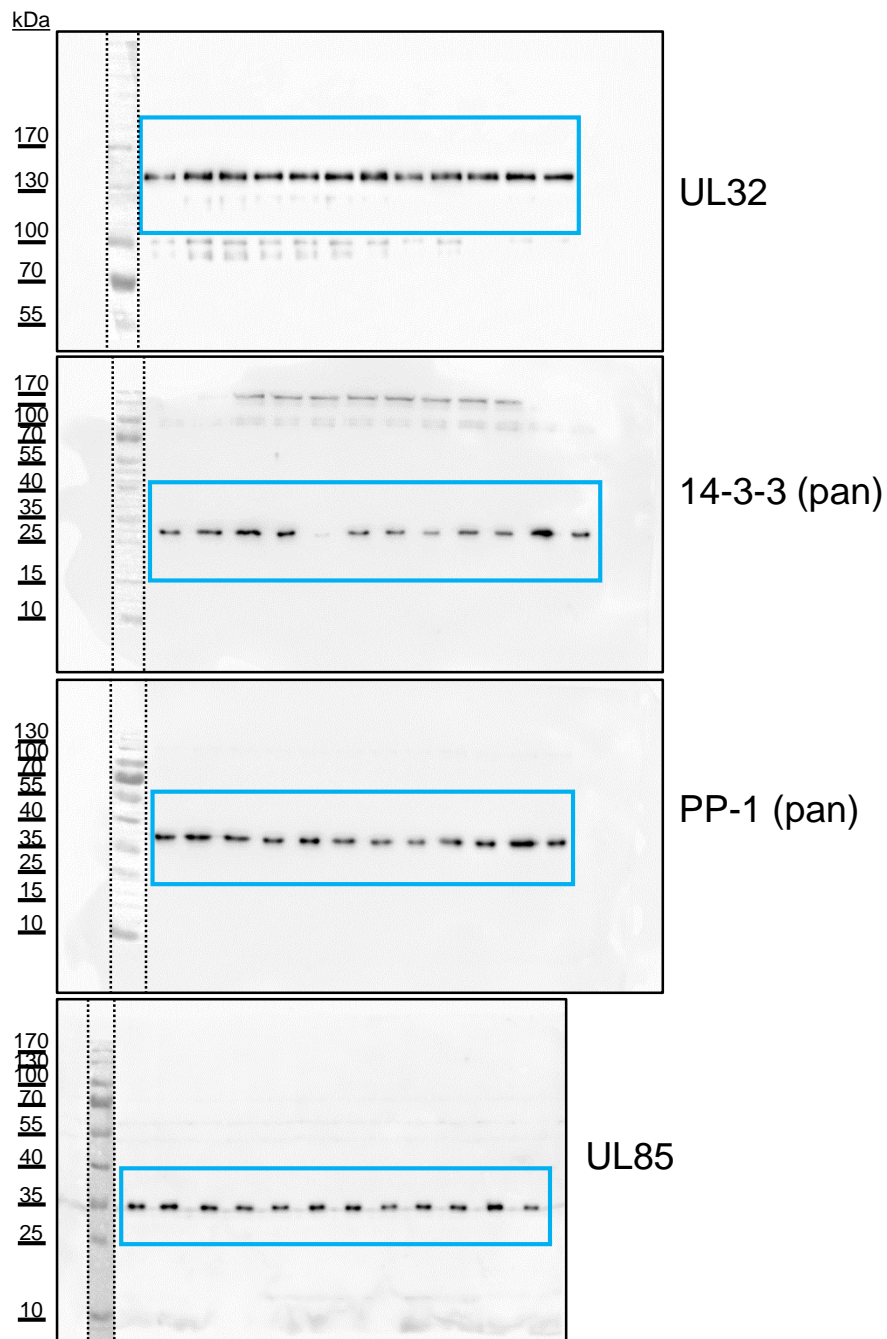

Fig. 4e

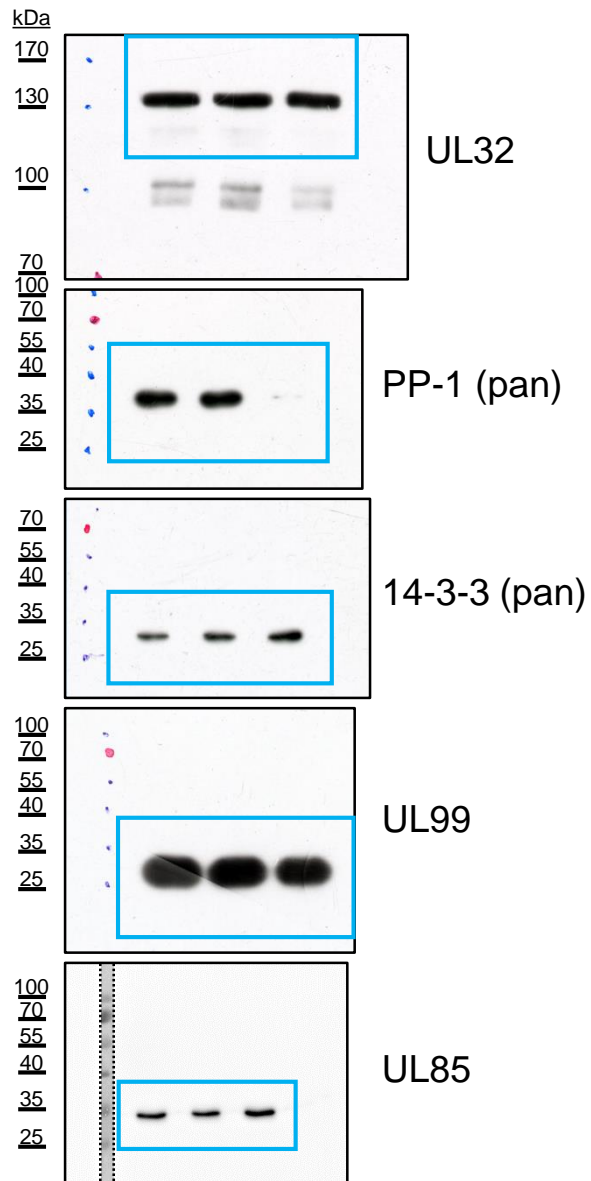

Ext. Data Fig. 5d

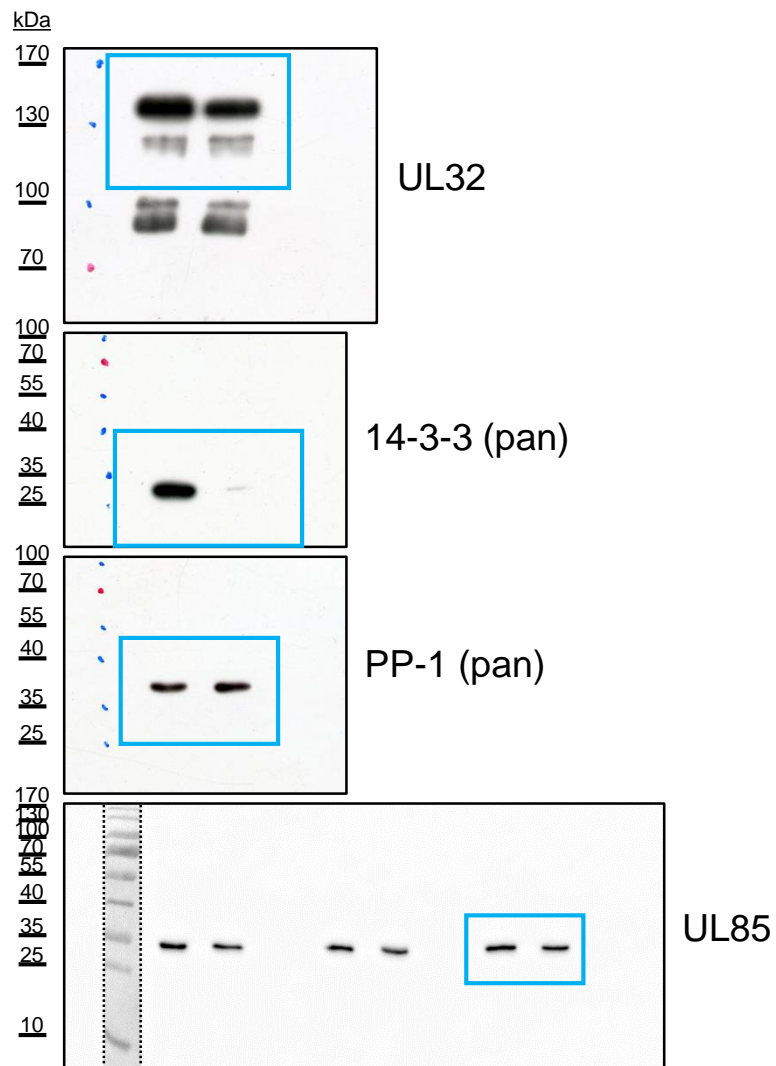

Ext. Data Fig. 5f

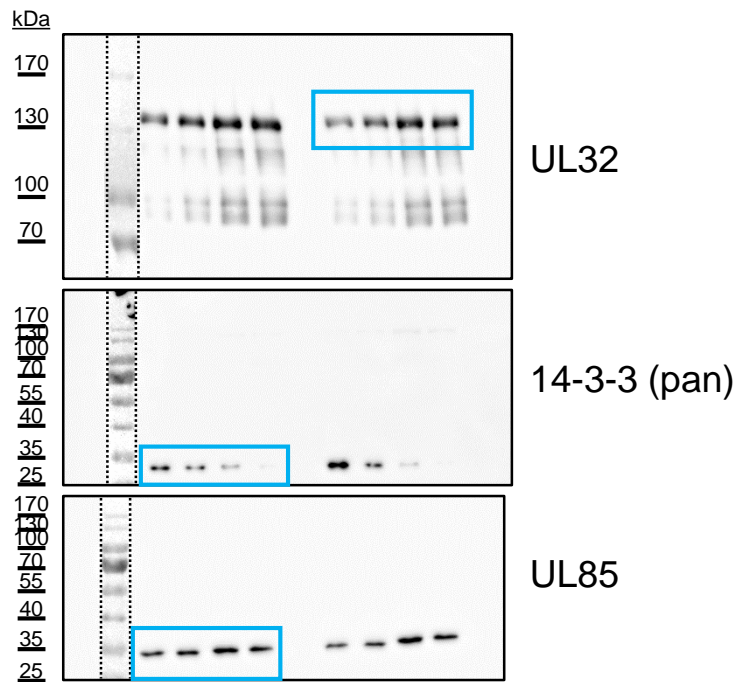

Ext. Data Fig. 7b

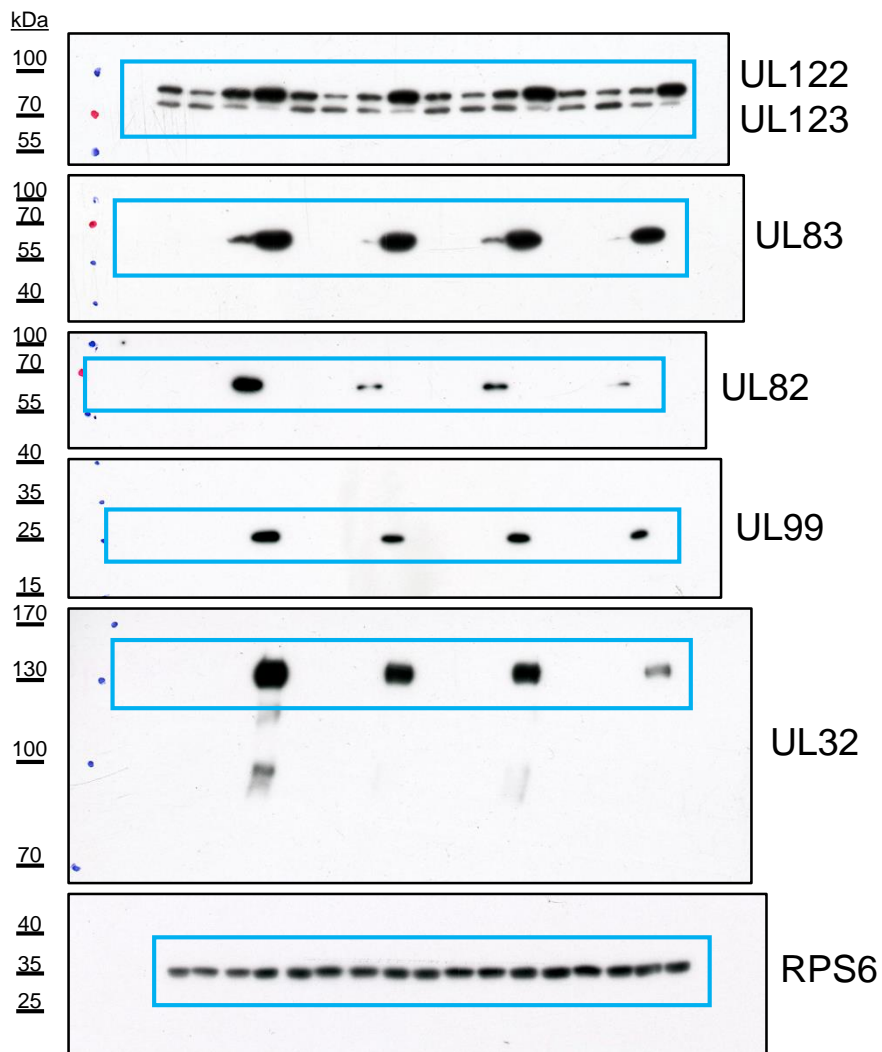

Ext. Data Fig. 7d

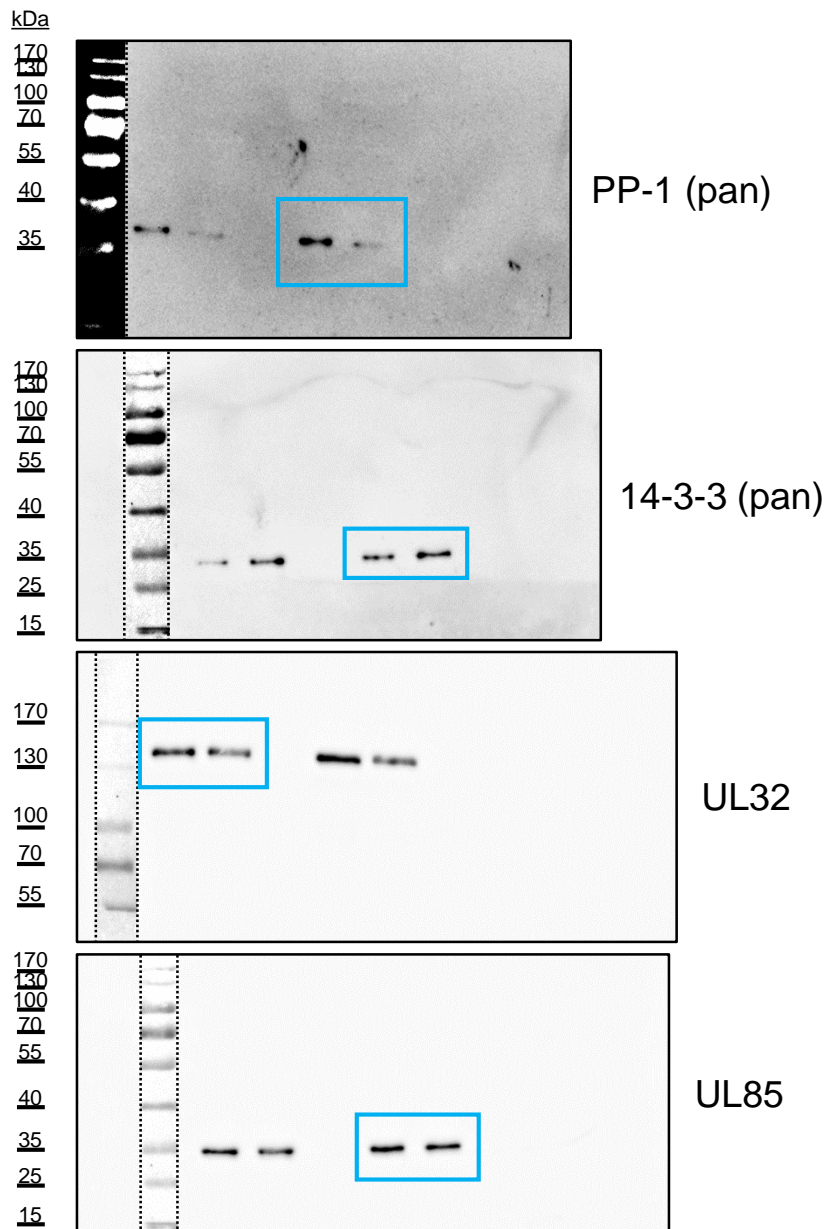

Ext. Data Fig. 9b

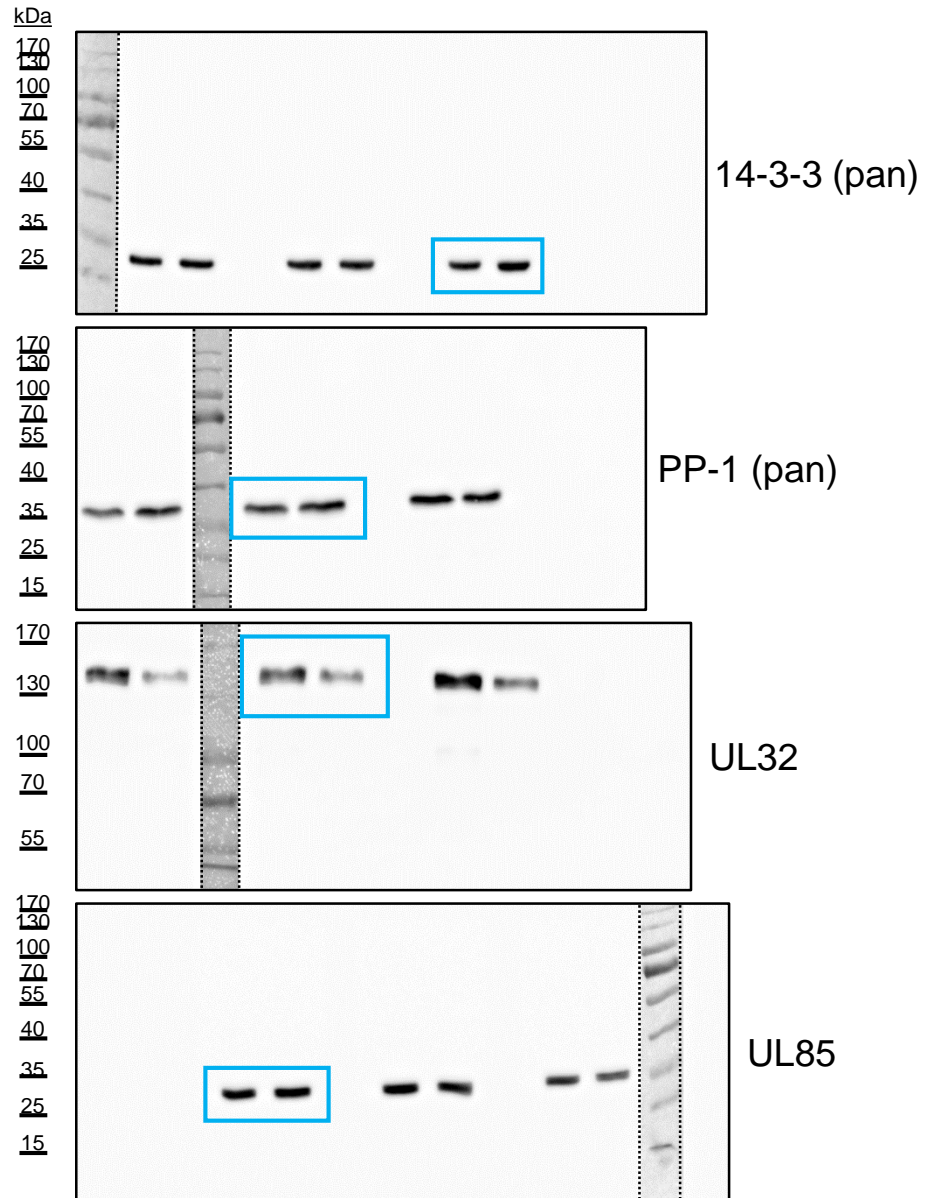

Ext. Data Fig. 9e

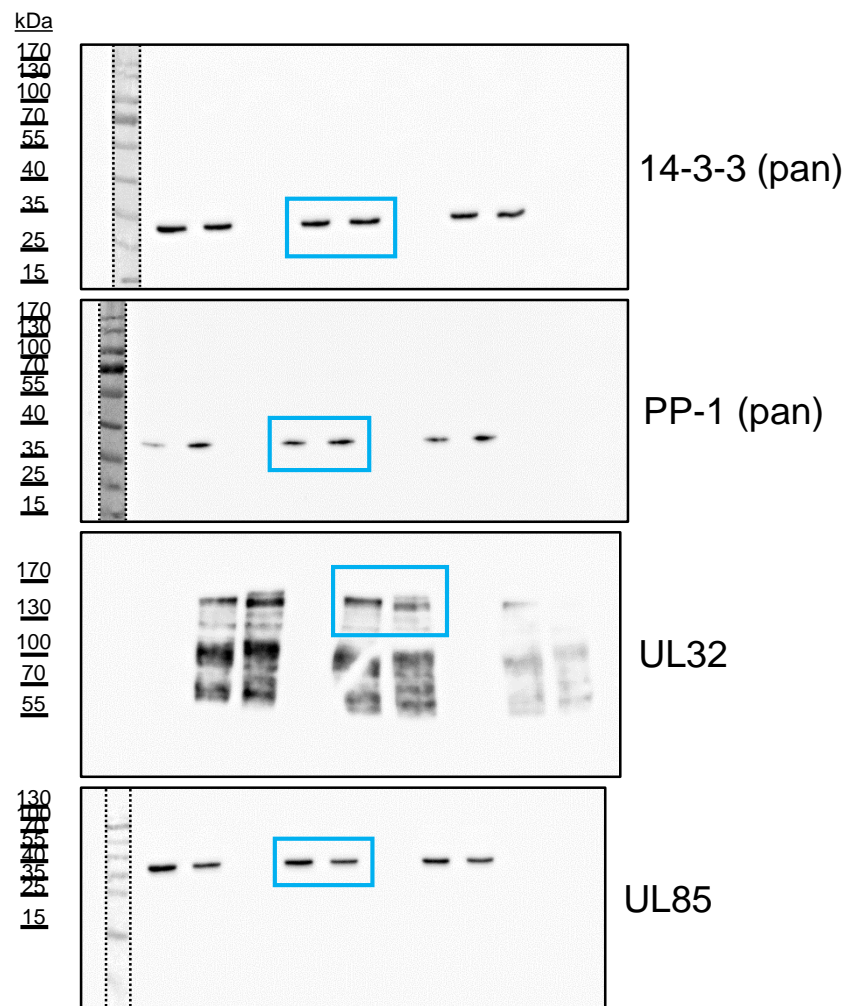

Supplement: 41564_2023_1433_MOESM8_ESM.pdf [file 41564_2023_1433_MOESM8_ESM.pdf]
